1 ***Determinants of birth asphyxia among newborns in Amhara national regional***  
2 ***state referral hospitals, Ethiopia***

3 **Alemwork Desta Meshesha<sup>1\*</sup>, Muluken Azage<sup>2</sup>, Endalkachew Worku<sup>3</sup>, Getahun Gebre**  
4 **Bogale<sup>4</sup>**

5  
6 **Affiliations**

7 <sup>1</sup>ART Clinic, Dessie Referral Hospital, Dessie, Amhara Regional State, Ethiopia

8 <sup>2</sup>Department of Environmental Health, School of Public Health, College of Medicine and Health  
9 Sciences, Bahir Dar University, Bahir Dar, Ethiopia

10 <sup>3</sup>Department of Reproductive Health and Population Studies, School of Public Health, College of  
11 Medicine and Health Sciences, Bahir Dar University, Bahir Dar, Ethiopia

12 <sup>4</sup>Department of Health Informatics, College of Medicine and Health Sciences, Wollo University,  
13 Dessie, Ethiopia.

14

15

16 \*Corresponding author

17 E-mail: [alemworkd21@gmail.com](mailto:alemworkd21@gmail.com) (AD)

18

19

20

21

22

23

24

25

## 26 **Abstract**

27 **Background:** Globally, every year, 2.5 million infants die within their first month of life.  
28 Neonatal asphyxia is the leading specific cause of neonatal mortality in low- and middle-income  
29 countries, including Ethiopia. Therefore, the aim of this study was to identify the determinants of  
30 birth asphyxia among newborns admitted in Amhara region referral hospitals, Ethiopia.

31 **Methods:** Facility-based unmatched case-control study was employed among 193 cases and 193  
32 controls of newborns. Newborns admitted to neonatal intensive care units with admission criteria  
33 of birth asphyxia and without birth asphyxia were considered as cases (Apgar score<7) and  
34 controls (Apgar score>=7) respectively. Data were collected using a structured questionnaire by  
35 systematic random sampling technique with proportional allocation, and entered in to Epi-Info  
36 version 7 and exported to SPSS version 20 for statistical analysis. Bivariate and multivariable  
37 logistic regression models were fitted to identify determinants of birth asphyxia.

38 **Results:** Newborns with low birth weight (<2.5kg) had 8.94 higher odds of birth asphyxia than  
39 those whose weight at birth was >=2.5kg at birth (AOR: 8.94, 95% CI: 4.08, 19.56). Newborns  
40 born at health centers were 7.36 times more likely to develop birth asphyxia than those born at  
41 hospitals (AOR: 7.36, 95% CI: 2.44, 22.13). Newborns born using instrumental delivery were 3.03  
42 times more likely to develop birth asphyxia than those delivered by vaginally (AOR: 3.03, 95%  
43 CI: 1.41, 6.49). Newborns from mothers with prolonged labor were 2 times more likely to suffer  
44 from birth asphyxia as compared to their counterparts (AOR: 2.00, 95% CI: 1.20, 3.36).

45 **Conclusion:** This study identified prolonged labor, instrumental delivery, delivered at health  
46 centers, and low birth weight were identified as determinants of birth asphyxia. Thus, intervention  
47 planning towards the identified determinants may be needed to reduce neonatal birth asphyxia.

48

## 49 **Introduction**

50 Birth asphyxia is a condition characterized by an impairment of exchange of the respiratory gases  
51 (oxygen and carbon dioxide) resulting in hypoxemia and hypercapnia, accompanied by metabolic  
52 acidosis [1]. Birth asphyxia is defined by the World Health Organization as “the failure to initiate  
53 and sustain breathing at birth”. Worldwide, birth asphyxia is a serious clinical problem leading to  
54 significant mortality and morbidity. Each year approximately 24% of neonatal deaths occurred  
55 due to birth asphyxia with an equal number of survivors with serious neurological sequelae,  
56 such as cerebral palsy, mental retardation and epilepsy leading to detrimental long term  
57 consequences for both child and family [2]. Birth asphyxia leads to the impairment of normal  
58 exchange of respiratory gases during the birth process and subsequent adverse effects on fetus [3].  
59 International reports indicated that birth asphyxia is the third cause of neonatal deaths (23%) next  
60 to infections (36%) and preterm (28%) [4]. In Ethiopia, birth asphyxia contributed 24% of neonatal  
61 deaths [5]. The Amhara national regional state health bureau estimated for 2017/18 that its  
62 prevalence was 7.8%.

63 Mothers and their newborns are vulnerable to illnesses and deaths during the postnatal period [6].  
64 Worldwide, 2.5 million infants die within their first month of life every year, contributing nearly  
65 47% of all deaths of children under-five year’s age. Almost all deaths of newborns are in  
66 developing countries, with the highest number in South Asia and sub-Saharan Africa [7]. Birth  
67 asphyxia is the leading specific cause of neonatal mortality in low and middle-income countries  
68 and it is also the main cause of long-term illnesses including mental retardation, cerebral palsy,  
69 and other neurodevelopmental disorders [8]. Ethiopia is one of the ten countries with the highest  
70 number of neonatal mortality worldwide, with an estimated number of 122,000 newborn deaths  
71 per year [9].

72 Studies from abroad indicated that low birth weight, caesarian section [10-12]; multiple births,  
73 lack of antenatal care[13]; maternal age, gravidity, mode of delivery [14], and prolonged labor,  
74 meconium stained amniotic fluid and fetal distress [12] were the significant causes of birth  
75 asphyxia. However, most of the studies were restricted in single institution and based on secondary  
76 data or records which may face to data/info incompleteness. Therefore, the aim of this study was  
77 to identify significant determinants of birth asphyxia among newborns to formulate intervention  
78 mechanisms at local, regional and national level.

## 79 **Methods**

### 80 **Study design, period and setting**

81 Facility-based unmatched case-control study was employed to identify the determinants of birth  
82 asphyxia among newborns in Amhara national regional state referral hospitals from March 1 to  
83 April 30, 2018.

84 The Amhara National Regional State is located in the North Western part of Ethiopia between  
85 9°20' and 14°20' North latitude and 36° 20' and 40° 20' East longitude. The Central Statistics  
86 Agency's total population projection estimate for the Amhara Region for 2017 is 21,134,988 with  
87 a fifty-fifty numerical split between the sexes. Of these 17% were urban residents which are below  
88 the national average [15]. According to Ethiopian 2009 Ethiopian Fiscal Year (EFY) Annual  
89 Performance Report published by Federal Ministry of Health, Amhara has 68 Hospitals, 841  
90 Health Centers and 3,342 Health Posts [16]. Among the sixty eight functional hospitals in the  
91 region, Dessie, Felege-Hiwot, University of Gondar, Debebirhan, and Debremaros hospitals are  
92 tertiary care (referral) hospitals. Thus, all the five referral hospitals are serving for all population  
93 found in the region.

### 94 **Study participants**

95 All asphyxiated and non-asphyxiated newborns admitted to neonatal intensive care units (NICU)  
96 of Referral Hospitals found in Amhara Regional state are study population. Newborns diagnosed  
97 as birth asphyxia from NICU were included for cases, while newborns without birth asphyxia were  
98 counted for controls. Newborns with no mothers (caregivers) due to death or newborns with loss  
99 of mothers and mothers who are sick and unable to respond were excluded from the study.

### 100 **Sample size and sampling procedures**

101 Sample size was calculated based on unmatched case control formula (Kelsey) with the  
102 assumptions of power=80% and 95% CI using Epi Info version 7. From previous case control  
103 studies on determinants of birth asphyxia, the major determinants were low birth weight  
104 ( $p=11.33\%$ ,  $OR=2.40$ ), gestational age of <37weeks ( $p=52\%$ ,  $OR=2.57$ ), multiple births ( $p=6.2\%$ ,  
105  $OR=0.11$ ), mode of delivery ( $p=22.2\%$ ,  $OR=2.94$ ), and gravidity ( $p=33.3\%$ ,  $OR=2.64$ ) [10, 14,  
106 17]. From the alternative sample sizes, the largest sample size (386; 193 cases and 193 controls)  
107 was selected. Recently, the five referral hospitals found in Amhara national regional state are  
108 evenly distributed. They have their own NICU. Among the total of 2091 predicted number of  
109 newborns admitted to NICU irrespective of status of birth asphyxia, 193 newborns with birth  
110 asphyxia (cases) and 193 newborns without birth asphyxia (controls) were selected using  
111 systematic random sampling technique with proportional allocation. Every 2<sup>nd</sup> of cases and every  
112 8<sup>th</sup> of controls were included in the study.

### 113 **Operational definition**

114 Birth Asphyxia: it is the failure to initiate and sustain breathing at birth. Asphyxiated newborn not  
115 able to breath after birth and either convulsions/spasms or not able to suckle normally after birth  
116 or not able to cry after birth or Appearance Pulse Grimace Activity Respiration (APGAR) Score  
117 of < 7 [18].

## 118 **Data collection procedures and data quality control**

119 The interviewer administered questionnaire was used for data collection. Through trained data  
120 collectors, the questionnaire was pretested in 5% of clients for possible modifications prior to data  
121 collection. The trained supervisors and the principal investigator supervised the data collection  
122 process. The collected data were checked daily for consistency, completeness, clarity and accuracy  
123 throughout the data collection process.

## 124 **Data analysis**

125 Collected data were edited, coded and entered to Epi info version 7 software packages. These were  
126 then exported to Statistical Package for Social Sciences (SPSS) version 20 for analysis. First  
127 descriptive analysis was presented using frequency tables, figures, and percentages. In the second  
128 stage, by using logistic regression, bivariate logistic regression was fitted to screen candidate  
129 variables with  $p\text{-value} < 0.2$  for the final model. Hosmer and Lemshow goodness of fit test was  
130 performed. Finally, multivariable logistic regression model through backward stepwise method  
131 was fitted to identify significant determinants of birth asphyxia. Adjusted Odds Ratio with 95%  
132 CI and  $p\text{-value} < 0.05$  were calculated to identify determinants of birth asphyxia among newborns.

## 133 **Results**

### 134 **Socio-demographic and behavioral characteristics**

135 A total of 193 asphyxiated newborn-mother pairs (cases) and 193 non-asphyxiated newborn-  
136 mother pairs (controls) were included in the study. Infants' mothers mean ( $\pm$ SD) age was  
137 26.63( $\pm$ 5.09) years. Among the total study groups, 109(56%) of cases and 105(54%) of controls  
138 were in the age group of 25-34 years. Majority of respondents (182 (94%) of cases and 170(88%)  
139 of controls) were married. More than half of the respondents; i.e. 103(53%) of cases and 121(63%)

140 of controls were came from urban area. Housewives and farmers constituted 133(69%) of cases  
 141 and 101(52%) of controls. Sixty three (33%) of cases and 53(28%) of controls were at elementary  
 142 school (1-8 grades). One hundred thirteen (59%) of cases and 95 (49%) of controls had less than  
 143 2000 ETB monthly incomes. Most of the cases and controls were come to hospitals from the  
 144 nearby areas. All respondents did not have smoking behavior. Majority of cases and controls (374  
 145 (97%)) hadn't ever khat chewing behavior. However, 62 (32%) of cases and 65 (34%) of controls  
 146 had ever drunk alcohol during the last pregnancy (Table 1).

147 Table 1: Socio-demographic and behavioral characteristics of respondents among newborns of  
 148 Amhara Region Referral Hospitals, Ethiopia, 2018

| Variables                                           | Controls (%)<br>(n=193) | Cases (%)<br>(n=193) | Total count (%)<br>(n=386) | Chi-square (p-<br>value) |
|-----------------------------------------------------|-------------------------|----------------------|----------------------------|--------------------------|
| Maternal age (in years)                             |                         |                      |                            |                          |
| 15-24                                               | 67 (34.7)               | 63 (32.6)            | 130 (33.7)                 | 0.198(0.906)             |
| 25-34                                               | 105 (54.4)              | 109 (56.5)           | 214 (55.4)                 |                          |
| 35-49                                               | 21 (10.9)               | 21 (10.9)            | 42 (10.9)                  |                          |
| Marital status                                      |                         |                      |                            |                          |
| Unmarried                                           | 23 (11.9)               | 11(5.7)              | 34 (8.8)                   | 4.644(0.031)             |
| Married                                             | 170 (88.1)              | 182 (94.3)           | 352 (91.2)                 |                          |
| Place of residence                                  |                         |                      |                            |                          |
| Urban                                               | 121 (62.7)              | 103 (53.4)           | 224 (58)                   | 3.446(0.063)             |
| Rural                                               | 72 (37.3)               | 90 (46.6)            | 162 (42)                   |                          |
| Maternal occupation                                 |                         |                      |                            |                          |
| Laborer & student                                   | 28 (14.5)               | 15 (7.8)             | 43 (11.1)                  | 12.261(0.016)            |
| Farmer                                              | 33 (17.1)               | 47 (24.4)            | 80 (20.7)                  |                          |
| Merchant                                            | 27 (14.0)               | 22 (11.4)            | 49 (12.7)                  |                          |
| Housewife                                           | 68 (35.2)               | 86 (44.6)            | 154 (39.9)                 |                          |
| Government employed                                 | 37 (19.2)               | 23 (11.9)            | 60 (15.5)                  |                          |
| Educational status                                  |                         |                      |                            |                          |
| Unable to read and write                            | 39 (20.2)               | 49 (25.4)            | 88 (22.8)                  | 9.694(0.046)             |
| Able to read and write with<br>informal education** | 12 (6.2)                | 17 (8.8)             | 29 (7.5)                   |                          |

|                                    |            |            |            |               |
|------------------------------------|------------|------------|------------|---------------|
| Elementary school (1-8 grades)     | 53 (27.5)  | 63 (32.6)  | 116 (30.1) |               |
| High school and Prep(9-12 grades)  | 42 (21.8)  | 39 (20.2)  | 81 (21.0)  |               |
| Above 12 grades                    | 47 (24.4)  | 25 (13.0)  | 72 (18.7)  |               |
| Monthly income (average in ETB)    |            |            |            |               |
| <=2000                             | 95 (49.2)  | 113 (58.5) | 208 (53.9) | 3.384(0.184)  |
| 2001-5000                          | 73 (37.8)  | 60 (31.1)  | 133 (34.5) |               |
| >5000                              | 25 (13.0)  | 20 (10.4)  | 45 (11.7)  |               |
| Distance from the hospital (in KM) |            |            |            |               |
| 0-10                               | 108 (56.0) | 78 (40.4)  | 186 (48.2) | 12.441(0.002) |
| 11-50                              | 62 (32.1)  | 70 (36.3)  | 132 (34.2) |               |
| 51-275                             | 23 (11.9)  | 45 (23.3)  | 68 (17.6)  |               |
| Khat chewing                       |            |            |            |               |
| No                                 | 187 (96.9) | 187 (96.9) | 374 (96.9) | -*            |
| Yes                                | 6 (3.1)    | 6 (3.1)    | 12 (3.1)   |               |
| Alcohol drinking                   |            |            |            |               |
| No                                 | 128 (66.3) | 131 (67.9) | 259 (67.1) | 0.106(0.745)  |
| Yes                                | 65 (33.7)  | 62 (32.1)  | 127 (32.9) |               |

149 -\*chi-square assumption not fulfilled

150 - \*\*informal education includes education delivered with campaign and at religious institutes

### 151 **Maternal health related variables**

152 Majorly 173 (90%) of cases and 177 (92%) of controls didn't faced pre-eclampsia /eclampsia,  
 153 however, 20 (10%) of cases and 16 (8%) of controls faced the problem. Eight (4%) of cases and  
 154 9(5%) of controls have HIV. Twenty two (9%) of cases and 14 (7%) of controls faced bleeding  
 155 during their last pregnancy. Forty four (23%) of cases and 32(17%) of controls had iron-deficiency  
 156 anemia. One hundred twenty four (64%) of cases and 89 (46%) of controls were referred from  
 157 another health facilities (Table 2).

158 Table 2: Maternal health related variables among newborns of Amhara Region Referral

159 Hospitals, Ethiopia, 2018



| Variables                   | Controls (%)<br>(n=193) | Cases (%)<br>(n=193) | Total count<br>(%)<br>(n=386) | Chi-square (p-value) |
|-----------------------------|-------------------------|----------------------|-------------------------------|----------------------|
| Pre-eclampsia/eclampsia     |                         |                      |                               |                      |
| No                          | 177 (91.7)              | 173 (89.6)           | 350 (90.7)                    | 0.490(0.484)         |
| Yes                         | 16 (8.3)                | 20 (10.4)            | 36 (9.3)                      |                      |
| HIV status                  |                         |                      |                               |                      |
| No                          | 184 (95.3)              | 185 (95.9)           | 369 (95.6)                    | 0.062(0.804)         |
| Yes                         | 9 (4.7)                 | 8 (4.1)              | 17 (4.4)                      |                      |
| Diabetes Mellitus           |                         |                      |                               |                      |
| No                          | 192 (99.5)              | 191 (99.0)           | 383 (99.2)                    | -*                   |
| Yes                         | 1 (0.5)                 | 2 (1.0)              | 3 (0.8)                       |                      |
| Bleeding in pregnancy (APH) |                         |                      |                               |                      |
| No                          | 179 (92.7)              | 171 (88.6)           | 350 (90.7)                    | 1.961(0.161)         |
| Yes                         | 14 (7.3)                | 22 (9.3)             | 36 (9.3)                      |                      |
| Iron-deficiency anemia      |                         |                      |                               |                      |
| No                          | 161 (83.4)              | 149 (77.2)           | 310 (80.3)                    | 2.359(0.125)         |
| Yes                         | 32 (16.6)               | 44 (22.8)            | 76 (19.7)                     |                      |
| Referral status             |                         |                      |                               |                      |
| No                          | 104 (53.9)              | 69 (35.8)            | 173 (44.8)                    | 12.832(0.000)        |
| Yes                         | 89 (46.1)               | 124 (64.2)           | 213 (55.2)                    |                      |

160 -\*chi-square assumption not fulfilled

### 161 **Antepartum and Intra-partum related variables**

162 Among the total respondents, 91(47%) of mothers with cases and 105(54%) of mothers with  
163 controls experienced more than one pregnancies, however, 102(53%) of cases and 88(46%) of  
164 controls experienced their first pregnancies. Of the study units, 84(44%) of cases and 96(50%) of  
165 controls; and 109(57%) of cases and 97(50%) of controls were multiparous and primiparous  
166 respectively. Five (2.6%) of the cases and 16(8.3%) of controls had given twins during their last  
167 pregnancy. Nearly 189(98%) of cases and 188(97%) of controls had antenatal care (ANC) visits.  
168 Of the total respondents, 88(46%) of cases and 67(35%) of controls experience prolonged labor  
169 during the last pregnancy. Of the infants' mothers, 45 (23%) of cases and 27 (14%) of controls

170 faced premature rupture of membranes before labor starts. Only 17 (9%) of cases and 12 (6%) of  
 171 controls faced prolonged rupture of membranes after 24 hours. Very few number of study subjects  
 172 (11 (6%) of cases and 4 (2%) of controls) faced cord prolapse. Twelve (13%) of cases and 7 (4%)  
 173 of controls had breech presentation. Of the total subjects, 53(28%) of cases and 61(32%) of  
 174 controls were delivered with cesarean section, and 38(20%) of cases and 15(8%) of controls were  
 175 delivered with instrumental assisted. Few respondents (30 (16%) of cases and 5 (3%) of controls)  
 176 got the delivery service at health centers (Table 3).

177 Table 3: Antepartum and Intra-partum characteristics of respondents among newborns of  
 178 Amhara Region Referral Hospitals, Ethiopia, 2018

| Variables                                                      | Controls (%)<br>(n=193) | Cases (%)<br>(n=193) | Total count (%)<br>(n=386) | Chi-square (p-<br>value) |
|----------------------------------------------------------------|-------------------------|----------------------|----------------------------|--------------------------|
| Gravidity                                                      |                         |                      |                            |                          |
| Primigravida                                                   | 88 (45.6)               | 102 (52.8)           | 190 (49.2)                 | 2.032(0.154)             |
| Multigravida                                                   | 105 (54.4)              | 91 (47.2)            | 196 (50.8)                 |                          |
| Parity                                                         |                         |                      |                            |                          |
| Primiparous                                                    | 97 (50.3)               | 109 (56.5)           | 206 (53.4)                 | 1.499(0.221)             |
| Multiparous                                                    | 96 (49.7)               | 84 (43.5)            | 180 (46.6)                 |                          |
| Fetal outcome                                                  |                         |                      |                            |                          |
| Single                                                         | 188 (97.4)              | 177 (91.7)           | 365 (94.6)                 | 6.093(0.014)             |
| Twins                                                          | 5 (2.6)                 | 16 (8.3)             | 21 (5.4)                   |                          |
| Number of ANC visits                                           |                         |                      |                            |                          |
| 0                                                              | 5 (2.6)                 | 4 (2.1)              | 9 (2.3)                    | 7.579(0.023)             |
| 1-3                                                            | 78 (40.4)               | 105 (54.4)           | 183 (47.4)                 |                          |
| >=4                                                            | 110 (57.0)              | 84 (43.5)            | 194 (50.3)                 |                          |
| Place of ANC visits                                            |                         |                      |                            |                          |
| Private and Non-Governmental<br>Organization's health facility | 28 (14.9)               | 29 (15.3)            | 57 (15.1)                  | 0.129(0.938)             |
| Public health facility                                         | 160 (85.1)              | 160 (84.7)           | 320 (84.9)                 |                          |
| Prolonged labor                                                |                         |                      |                            |                          |
| No                                                             | 126 (65.3)              | 105 (54.4)           | 231 (59.8)                 | 4.754(0.029)             |
| Yes                                                            | 67 (34.7)               | 88 (45.5)            | 145 (40.2)                 |                          |

|                                |            |            |            |               |
|--------------------------------|------------|------------|------------|---------------|
| Premature rupture of membranes |            |            |            |               |
| No                             | 166 (86.0) | 148 (76.7) | 314 (81.3) | 5.532(0.019)  |
| Yes                            | 27 (14.0)  | 45 (23.3)  | 72 (18.7)  |               |
| Prolonged rupture of membranes |            |            |            |               |
| No                             | 181 (93.8) | 176 (91.2) | 357 (92.5) | 0.932(0.334)  |
| Yes                            | 12 (6.2)   | 17 (8.8)   | 29 (7.5)   |               |
| Cord prolapse                  |            |            |            |               |
| No                             | 189 (97.9) | 182 (94.3) | 371 (96.1) | 3.399(0.065)  |
| Yes                            | 4 (2.1)    | 11 (5.7)   | 15 (3.9)   |               |
| Presentation                   |            |            |            |               |
| Cephalic                       | 186 (94.4) | 168 (87.0) | 354 (91.7) | 11.040(0.001) |
| Breech                         | 7 (3.6)    | 25 (13.0)  | 32 (8.3)   |               |
| Mode of delivery               |            |            |            |               |
| Vaginally                      | 117 (60.6) | 102 (52.8) | 219 (56.7) | 11.570(0.003) |
| Cesarean section               | 61 (31.6)  | 53 (27.5)  | 114 (29.5) |               |
| Instrumental                   | 15 (7.8)   | 38 (19.7)  | 53 (13.7)  |               |
| Place of delivery              |            |            |            |               |
| Health center                  | 5 (2.6)    | 30 (15.5)  | 35 (9.1)   | 19.638(0.000) |
| Hospital                       | 188 (97.4) | 163 (84.5) | 351 (90.9) |               |

179

## 180 Newborn characteristics

181 Of the total newborns, 117(61%) of cases and 104(54%) of controls are males. Among all sexes,  
 182 65(35%) of cases and 10(5%) of controls had low birth weight. Both preterm and post-terms  
 183 contributed 43(22%) of cases and 17(9%) of controls. One hundred forty six (76%) of cases were  
 184 unable to breath after birth, however, only 31(16%) of cases experienced spasm. The majority, 189  
 185 (98%) of cases were unable to suckle normally after birth, and 184 (95%) of cases were unable to  
 186 cry after birth (Table 4).

187 Table 4: Newborn characteristics among newborns of Amhara Region Referral Hospitals,  
 188 Ethiopia, 2018

| Variables | Controls (%)<br>(n=193) | Cases (%)<br>(n=193) | Total count (%)<br>(n=386) | Chi-square (p-<br>value) |
|-----------|-------------------------|----------------------|----------------------------|--------------------------|
|-----------|-------------------------|----------------------|----------------------------|--------------------------|

|                                     |            |            |            |               |
|-------------------------------------|------------|------------|------------|---------------|
| Sex of newborn                      |            |            |            |               |
| Male                                | 104 (53.9) | 117 (60.6) | 221 (57.3) | 1.789(0.181)  |
| Female                              | 89 (46.1)  | 76 (39.4)  | 165 (42.7) |               |
| Birth weight                        |            |            |            |               |
| Low birth weight (<2.5kg)           | 10 (5.2)   | 67 (34.7)  | 77 (19.9)  | 52.709(0.000) |
| Normal (>=2.5kg)                    | 183 (94.8) | 126 (65.3) | 309 (80.1) |               |
| Gestational age (Wks)               |            |            |            |               |
| <37 (Preterm)                       | 5 (2.6)    | 32 (16.6)  | 37 (9.6)   | 21.820(0.000) |
| 37-41(Term)                         | 176 (91.2) | 150 (77.7) | 326 (84.5) |               |
| >41 (Post-term)                     | 12 (6.2)   | 11 (5.7)   | 23 (6.0)   |               |
| Able to breath after birth          |            |            |            |               |
| No                                  | 0 (0.0)    | 146 (75.6) | 146 (37.8) | - *           |
| Yes                                 | 193 (100)  | 47 (24.4)  | 240 (62.2) |               |
| Had convulsions / spasm             |            |            |            |               |
| No                                  | 193 (100)  | 162 (83.9) | 355 (92.0) | - *           |
| Yes                                 | 0 (0.0)    | 31 (16.1)  | 31 (8.0)   |               |
| Able to suckle normally after birth |            |            |            |               |
| No                                  | 0 (0.0)    | 189 (97.9) | 189 (49.0) | - *           |
| Yes                                 | 193 (100)  | 4 (2.1)    | 197 (51.0) |               |
| Able to cry after birth             |            |            |            |               |
| No                                  | 0 (0.0)    | 184 (95.3) | 184 (47.7) | - *           |
| Yes                                 | 193 (100)  | 9 (4.7)    | 202 (52.3) |               |
| APGAR Score                         |            |            |            |               |
| Severe (0-3)                        | 0 (0.0)    | 13 (6.7)   | 13 (3.4)   | - *           |
| Mild to moderate (4-6)              | 0 (0.0)    | 180 (93.3) | 180 (46.6) |               |
| Normal (7-10)                       | 193 (100)  | 0 (0.0)    | 193 (50.0) |               |

189 -\*chi-square assumption not fulfilled

## 190 **Determinants of birth asphyxia**

191 In binary logistic regression analysis, twenty seven variables were entered in the analysis and only  
 192 twenty variables were identified as determinants of birth asphyxia (Table 6). The others theme of  
 193 variables did not have association to birth asphyxia. Variables that have  $p < 0.2$  in the bivariate  
 194 analysis and enter to multivariable analysis were; maternal marital status, place of residence,

195 occupation, education, distance from the hospitals, bleeding during pregnancy, iron-deficiency  
 196 anemia, referral status, gravidity, multiple births, number of ANC visits, prolonged labor,  
 197 premature rupture of membrane, cord prolapse, fetal presentation, mode of delivery, place of  
 198 delivery, gestational age, sex of newborn, and birth weight. After adjustment, the determinants that  
 199 have  $p < 0.05$  at 95% confidence interval are only prolonged labor, mode of delivery, place of  
 200 delivery, and birth weight (Table 5).

201 Newborns born from mothers with prolonged labor were 2 times more likely to suffer from birth  
 202 asphyxia as compared to their counterparts (AOR: 2.00, 95% CI: 1.20, 3.36). Newborns that were  
 203 born using instrumental delivery were 3.03 times more likely to develop birth asphyxia than those  
 204 delivered by vaginally (AOR: 3.03, 95% CI: 1.41, 6.49). Newborns that were born at health centers  
 205 were 7.36 times more likely to develop birth asphyxia than those born at hospitals (AOR: 7.36,  
 206 95% CI: 2.44, 22.13). Newborns with low birth weight (2.5kg) had 8.94 higher odds of birth  
 207 asphyxia than those of normal ( $\geq 2.5$ kg) at birth (AOR: 8.94, 95% CI: 4.08, 19.56) (Table 5).

208 Table 5: Determinants of birth asphyxia among newborns of Amhara Region Referral Hospitals,  
 209 Ethiopia, 2018

| Variables           | Contro<br>ls | Cases | Crudes and Adjusted Odds Ratios with 95%<br>Confidence Intervals |                  |
|---------------------|--------------|-------|------------------------------------------------------------------|------------------|
|                     |              |       | COR (95% CI)                                                     | AOR (95% CI)     |
| Marital status      |              |       |                                                                  |                  |
| Unmarried           | 23           | 11    | 1                                                                | 1                |
| Married             | 170          | 182   | 2.24(1.06, 4.73)                                                 | 1.79(0.71, 4.47) |
| Place of residence  |              |       |                                                                  |                  |
| Urban               | 121          | 103   | 1                                                                | 1                |
| Rural               | 72           | 90    | 1.47(0.98, 2.21)                                                 | 0.78(0.36, 1.66) |
| Maternal occupation |              |       |                                                                  |                  |
| Laborer & student   | 28           | 15    | 0.86(0.38, 1.95)                                                 | 1.04(0.39, 2.83) |
| Farmer              | 33           | 47    | 2.29(1.16, 4.54)*                                                | 1.74(0.67, 4.49) |
| Merchant            | 27           | 22    | 1.31(0.61, 2.82)                                                 | 0.90(0.33, 2.42) |

|                                    |     |     |                   |                    |
|------------------------------------|-----|-----|-------------------|--------------------|
| Housewife                          | 68  | 86  | 2.04(1.11, 3.74)* | 1.52(0.70, 3.30)   |
| Government employed                | 37  | 23  | 1                 | 1                  |
| Educational status                 |     |     |                   |                    |
| Unable to read and write           | 39  | 49  | 2.36(1.24, 4.49)* | 1.83(0.51, 6.59)   |
| Able to read and write             | 12  | 17  | 2.66(1.10, 6.45)* | 2.07(0.51, 8.42)   |
| Elementary school (1-8 grades)     | 53  | 63  | 2.24(1.22, 4.10)* | 1.73(0.57, 5.27)   |
| High school and Prep(9-12 grades)  | 42  | 39  | 1.75(0.91, 3.35)  | 1.78(0.62, 5.14)   |
| Above 12 grades                    | 47  | 25  | 1                 | 1                  |
| Distance from the hospital (in KM) |     |     |                   |                    |
| 0-10                               | 108 | 78  | 1                 | 1                  |
| 11-50                              | 62  | 20  | 1.56(0.99, 2.45)  | 0.74(0.39, 1.39)   |
| 51-275                             | 23  | 45  | 2.71(1.52, 4.84)* | 1.69(0.78, 3.65)   |
| Bleeding in pregnancy (APH)        |     |     |                   |                    |
| No                                 | 179 | 171 | 1                 | 1                  |
| Yes                                | 14  | 22  | 1.65(0.82, 3.32)  | 1.24(0.51, 3.01)   |
| Iron-deficiency anemia             |     |     |                   |                    |
| No                                 | 161 | 149 | 1                 | 1                  |
| Yes                                | 32  | 44  | 1.49(0.90, 2.47)  | 1.29(0.68, 2.44)   |
| Referral status                    |     |     |                   |                    |
| No                                 | 104 | 69  | 1                 | 1                  |
| Yes                                | 89  | 124 | 2.10(1.40, 3.16)* | 1.72(0.95, 3.11)   |
| Gravidity                          |     |     |                   |                    |
| Primigravida                       | 88  | 102 | 1                 | 1                  |
| Multigravida                       | 105 | 91  | 0.75(0.50, 1.12)  | 0.83(0.48, 1.42)   |
| Fetal outcome                      |     |     |                   |                    |
| Single                             | 188 | 177 | 1                 | 1                  |
| Twins                              | 5   | 16  | 3.40(1.22, 9.47)* | 1.90(0.51, 7.15)   |
| Number of ANC visits               |     |     |                   |                    |
| 0                                  | 5   | 4   | 1.05(0.27, 4.02)  | 0.22(0.04, 1.15)   |
| 1-3                                | 78  | 105 | 1.76(1.17, 2.65)* | 1.34(0.81, 2.21)   |
| >=4                                | 110 | 84  | 1                 | 1                  |
| Prolonged labor                    |     |     |                   |                    |
| No                                 | 126 | 105 | 1                 | 1                  |
| Yes                                | 67  | 88  | 1.58(1.05, 2.38)* | 2.00(1.20, 3.36)** |
| Premature rupture of membranes     |     |     |                   |                    |
| No                                 | 166 | 148 | 1                 | 1                  |

|                                    |     |     |                    |                      |
|------------------------------------|-----|-----|--------------------|----------------------|
| Yes                                | 27  | 45  | 1.87(1.11, 3.16)*  | 1.55(0.82, 2.95)     |
| Cord prolapse                      |     |     |                    |                      |
| No                                 | 189 | 182 | 1                  | 1                    |
| Yes                                | 4   | 11  | 2.86(0.89, 9.13)   | 3.41(0.86, 13.46)    |
| Presentation                       |     |     |                    |                      |
| Cephalic                           | 186 | 168 | 1                  | 1                    |
| Breech                             | 7   | 25  | 3.95(1.67, 9.38)*  | 2.71(0.96, 7.70)     |
| Mode of delivery                   |     |     |                    |                      |
| Spontaneous vaginal delivery (SVD) | 117 | 102 | 1                  | 1                    |
| Cesarean section                   | 61  | 53  | 0.99(0.63, 1.57)   | 0.96(0.55, 1.67)     |
| Instrumental                       | 15  | 38  | 2.91(1.51, 5.59)*  | 3.03(1.41, 6.49)**   |
| Place of delivery                  |     |     |                    |                      |
| Health center                      | 5   | 30  | 6.92(2.62, 18.25)* | 7.36(2.44, 22.13)*** |
| Hospital                           | 188 | 163 | 1                  | 1                    |
| Sex of newborn                     |     |     |                    |                      |
| Male                               | 104 | 117 | 1                  | 1                    |
| Female                             | 89  | 76  | 0.76(0.51, 1.14)   | 0.79(0.48, 1.30)     |
| Birth weight                       |     |     |                    |                      |
| Low birth weight (<2.5kg)          | 10  | 67  | 9.73(4.82, 19.64)* | 8.94(4.08, 19.56)*** |
| Normal (>=2.5kg)                   | 183 | 126 | 1                  | 1                    |
| Gestational age (Wks)              |     |     |                    |                      |
| <37 (Preterm)                      | 5   | 32  | 6.98(2.00, 24.32)* | 4.02(0.89, 18.13)    |
| 37-41(Term)                        | 176 | 150 | 0.93(0.40, 2.17)   | 0.70(0.26, 1.93)     |
| >41 (Post-term)                    | 12  | 11  | 1                  | 1                    |

210 \* p<0.20; \*\*p<0.01; \*\*\*p<0.001

## 211 Discussion

212 This study identified significant determinants of birth asphyxia in Amhara National Regional State  
 213 Referral Hospitals, Ethiopia. Some of intra-partum and newborn-related variables were associated  
 214 to birth asphyxia. Prolonged labor, mode of delivery (instrumental), place of delivery (at health  
 215 centers), and low birth weight were identified as significant determinants of neonatal birth  
 216 asphyxia. This study will be informing health care providers especially at health centers for their

217 appropriate interventions and even it may needs managerial decisions for improving referral  
218 systems to make fast to reduce the burden of birth asphyxia occurred at primary health care level.  
219 This finding shows that prolonged labor is statistically significant determinant of birth asphyxia.  
220 It is in line with a cross-sectional study done in Jimma zone of Ethiopia [19]. Other previous studies  
221 have also shown similar results [20, 21]. Women with a prolonged labor had a negative birth  
222 experience more often than did women who had a normal labor [22]. According to American  
223 Pregnancy Association and Reiter and Walsh, PC, prolonged labor or failure to progress occurs  
224 when labor lasts for approximately 20 hours or more if you are a first-time mother, and 14 hours  
225 or more if you have previously given birth. A prolonged latent phase happens during the first stage  
226 of labor. It can be exhausting and emotionally draining, but rarely leads to complications.  
227 Prolonged labor may happen due to slow effacement of the cervix, too large baby, too small  
228 birthing canal or woman's pelvis, carrying multiples, incorrect fetal presentation, psychological  
229 factors, such as worry, stress, or fear [23, 24].

230 Our study result shows that mode of delivery (in our case, instrumental delivery) determined the  
231 occurrence of neonatal birth asphyxia. This in agreement with a case control study done in India  
232 [25] and cross-section findings in Ethiopia [26] and Pakistan [27]. A research conducted in  
233 England revealed that infants born by instrumental delivery (forceps and vacuum delivery) for  
234 presumed fetal compromise had the poorest condition at birth [28]. Infants delivered by  
235 instrumental delivery had the worst neonatal effects, suggesting the mode of delivery itself is  
236 influential [28]. Instrumental delivery is permitted when spontaneous vaginal delivery is failed. It  
237 is, therefore, the practitioners may delay to practice after the rapture of membrane and the newborn  
238 may come to asphyxia.



239 The study shows that neonates born at health centers had higher risk of birth asphyxia than those  
240 who born at hospitals. In many scholars, place of delivery, in general, has an association with birth  
241 asphyxia [14, 29, 30]. In our cases we couldn't get similar studies for comparison, however, there  
242 might be different causes of higher asphyxiated cases born in health centers, such as lack of skilled  
243 birth attendants in the health centers, and/or delay to refer the cases to hospitals, and/or  
244 transportation issues.

245 This finding shows that neonates with low birth weight had higher risk of asphyxia than those with  
246 normal birth weight. Other studies in Thailand, Pakistan, and Iran also revealed similar results [10,  
247 14, 17]. Low birth weight is mostly indicated as a fetal risk factor. The primary cause of low birth  
248 weight is premature birth (being born before 37 weeks gestation), as it is true for our finding, 10%  
249 of neonates were preterm. Another causes of low birth weight is intrauterine growth restriction,  
250 maternal health issues, early maternal age, and multiple births [31]. Low birth weight neonates  
251 should to be given much more attention compared to their counterparts whose birth weight are  
252 normal as they are prone to asphyxia [32].

253 This study has strength in that the study was done at region level on five referral hospitals, which  
254 may reflect regional burden at hospital levels. There are limitations of the study as it is hospital  
255 based study where majority of births were attended by qualified personnel, this does not reflect  
256 exact risk factors prevalent in the community, where majority of births are unable to access those  
257 referral hospitals. Also, because a person is assigning the number, the Apgar score is subjective  
258 that may under or overestimate the magnitude of birth asphyxia.

## 259 **Conclusions**

260 This study identified determinants of neonatal birth asphyxia in Amhara National Regional State  
261 Referral Hospitals, Ethiopia. Prolonged labor/failure to progress, mode of delivery (instrumental),

262 place of delivery (at health centers), and low birth weight were identified as statistically significant  
263 determinants of birth asphyxia. Even though most of the identified variables are the common and  
264 familiar causes of birth asphyxia, neonates born at health centers were more exposed to birth  
265 asphyxia than neonates born in hospitals. This might be due to delay of referral process and lack  
266 of skilled professionals in health centers. Consequently, it may indicate the need of operational  
267 intervention planning and further researches. Further researches may be recommended to identify  
268 why neonatal birth asphyxia is high at health centers than hospitals.

### 269 **Ethics approval and consent to participate**

270 Ethical clearance was obtained from the ethical review board of School of Public Health, College  
271 of Medicine and Health Sciences, Bahir Dar University. Permission was obtained from Amhara  
272 public health institute and five referral hospitals. Full explanation of the study was given to  
273 respondents and oral consent was obtained from them. Personal identifiers (like respondents'  
274 name) were not included in data collection. That is confidentiality of data was maintained  
275 anonymously. There was no known risk on participating in this study. Study subjects might not  
276 directly benefit from participating in the study. However, information obtained from this study  
277 may be used to improve the health of newborns. Respondents were free to decline participation or  
278 withdraw from study participation during data collection.

### 279 **Funding**

280 Bahir Dar University, Ethiopia was the sponsoring organization for this paper. However, the  
281 organization did not have role in the design of the study and collection, analysis, and interpretation  
282 of data and in writing the manuscript.

### 283 **Authors' contributions**

284 **AD** conceived the concept of the study, designed the study, and prepared the proposal, involved  
285 in the data analysis and interpretation. **MA** and **EW** involved in the designing of the study, revised  
286 the proposal, involved in the data analysis and interpretation. **GG** assisted and provided technical  
287 support on every step of proposal development and data management. All of the authors  
288 contributed to the preparation of the manuscript and approved the final version for publication.

## 289 **Supporting information**

290 S1 Data. This is the data set of the study. (SAV)

## 291 **Acknowledgements**

292 We are very grateful to Bahir Dar University for the approval of the ethical clearance. We would  
293 also like to thank all individuals participated in this study for their cooperation in taking part in  
294 this study.

## 295 **References**

- 296 1. Antonucci R, Porcella A, Pilloni MD. Perinatal asphyxia in the term newborn. *ournal of Pediatric and*  
297 *Neonatal Individualized Medicine*. 2014;3(2).
- 298 2. Tabassum F, Rizvi A, Ariff S, Soofi S, Bhutta ZA. Risk Factors Associated with Birth Asphyxia in Rural  
299 District Matiari, Pakistan: A Case Control Study. *International Journal of Clinical Medicine*.  
300 2014;5:1430-41.
- 301 3. Babu BVA, Devi SS, Kumar BK. Birth asphyxia – Incidence and immediate outcome in relation to  
302 risk factors and complications. *Int J Res Health Sci*. 2014;2(4):1064-71.
- 303 4. World Health Organization. Newborn death and illness 2011 [cited 2017 December 24]. Available  
304 from: [http://www.who.int/pmnch/media/press\\_materials/fs/fs\\_newbornddeath\\_illness/en/](http://www.who.int/pmnch/media/press_materials/fs/fs_newbornddeath_illness/en/)
- 305 5. Federal MoH, Ethiopia. National Strategy for Newborn and Child Survival in Ethiopia. 2015.
- 306 6. Tesfahun F, Worku W, Mazengiya F, Kifle M. Knowledge, Perception and Utilization of Postnatal Care  
307 of Mothers in Gondar Zuria District, Ethiopia: A Cross-Sectional Study. *Maternal and Child Health*  
308 *Journal* 2014;18:2341–51.
- 309 7. UNICEF. Neonatal mortality 2018 [cited 2019 12-04]. Available from:  
310 <https://data.unicef.org/topic/child-survival/neonatal-mortality/>.

- 311 8. Wallander JL. Brain research to ameliorate impaired neurodevelopment–home-based intervention  
312 trial. *BMC Pediatr.* 2010.
- 313 9. Lawn JE, Kinney MV, Black RE, Pitt C, Cousens S, Kerber K, et al. Newborn survival: a multi-country  
314 analysis of a decade of change. *Health Policy Plan* 2012. 2012;27.
- 315 10. Pitsawong C, Panichkul P. Risk Factors Associated with Birth Asphyxia in Phramongkutklo Hospital.  
316 *Thai Journal of Obstetrics and Gynaecology.* 2011;19:165-71.
- 317 11. Rahim F, Jan A, Mohummad J, Iqbal H. PATTERN AND OUTCOME OF ADMISSIONS TO NEONATAL  
318 UNIT OF KHYBER TEACHING HOSPITAL, PESHAWAR. *Pak J Med Sci.* 2007;23(2):249-53.
- 319 12. Wosenu L, Worku AG, Teshome DF, Gelagay AA. Determinants of birth asphyxia among live birth  
320 newborns in University of Gondar referral hospital, northwest Ethiopia: A case-control study. *PloS*  
321 *one.* 2018;13(9):e0203763.
- 322 13. Majeed R, Memon Y, Majeed F, Shaikh NP, Rajar UD. RISK FACTORS OF BIRTH ASPHYXIA. *J Ayub Med*  
323 *Coll Abbottabad.* 2007;19(3).
- 324 14. Aslam HM, Saleem S, Afzal R, Iqbal U, Saleem SM, Shaikh MWA, et al. Risk factors of birth asphyxia.  
325 *BMC ITALIAN JOURNAL OF PEDIATRICS.* 2014.
- 326 15. Central Statistical Agency, Ethiopia. Population Projection of Ethiopia for All Regions At Wereda  
327 Level from 2014 – 2017 2013.
- 328 16. Federal MoH, Ethiopia. Health Sector Transformation Plan-1: Annual Performance Report, Version 1.  
329 Addis Ababa: Federal Ministry of Health 2017.
- 330 17. Nayeri F, Shariat M, Dalili H, Adam LB, Mehrjerdi FZ, Shakeri A. Perinatal risk factors for neonatal  
331 asphyxia in Vali-eAsr hospital, Tehran-Iran. *Iran J Reprod Med.* 2012;10(2):137-40.
- 332 18. World Health Organization, Johns Hopkins University, The London School of Hygiene and Tropical  
333 Medicine, Institute OUatKMR. A Standard Verbal Autopsy Method for Investigating Causes of Death  
334 in Infants and Children. 1999.
- 335 19. Belachew T, Joseph J. Birth asphyxia and associated factors among newborns delivered in Jimma  
336 zone public hospitals, Southwest Ethiopia: A cross-sectional study. *Journal of Midwifery and*  
337 *Reproductive Health.* 2018;6(2):1289-95.
- 338 20. Chiabi A, Nguéfack S, Mah E, Nodem S, Mbuagbaw L, Mbonda E, et al. Risk Factors for Birth Asphyxia  
339 in an Urban Health Facility in Cameroon. *Iran J Child Neurol.* 2013;7(3).
- 340 21. SHIREEN N, NAHAR N, MOLLAH AH. Risk Factors and Short-Term Outcome of Birth Asphyxiated  
341 Babies in Dhaka Medical College Hospital. *BANGLADESH J CHILD HEALTH.* 2009;33(3):83-9.

- 342 22. Nystedt A, Hildingsson I. Diverse definitions of prolonged labour and its consequences with  
343 sometimes subsequent inappropriate treatment. *BMC Pregnancy and Childbirth*. 2014;14(233).
- 344 23. American Pregnancy Association. Prolonged Labor: Failure To Progress 2017 [cited 2018 May 22].  
345 Available from: <http://americanpregnancy.org/labor-and-birth/prolonged-labor-failure-progress/>.
- 346 24. Reiter and Walsh P. Birth Asphyxia and HIE (Hypoxic-Ischemic Encephalopathy) from Prolonged  
347 Labor 2018. Available from: [https://www.abclawcenters.com/practice-areas/prenatal-birth-  
348 injuries/fetus-or-newborn-medical-problems/birth-asphyxia-lawyers/birth-asphyxia-hypoxic-  
349 ischemic-encephalopathy-hie-often-caused-prolonged-labor/](https://www.abclawcenters.com/practice-areas/prenatal-birth-injuries/fetus-or-newborn-medical-problems/birth-asphyxia-lawyers/birth-asphyxia-hypoxic-ischemic-encephalopathy-hie-often-caused-prolonged-labor/).
- 350 25. Gane B, **B VB**, Rao R, Nandakumar S, Adhisivam B, Rojo Joy, et al. Antenatal and intrapartum risk  
351 factors for perinatal asphyxia: A case control study. *Curr Pediatr Res*. 2013;17(2):119-22.
- 352 26. Ibrahim NA, Muhye A, Abdulie S. Prevalence of Birth Asphyxia and Associated Factors among  
353 Neonates Delivered in Dilchora Referral Hospital, in Dire Dawa, Eastern Ethiopia. *Clinics in Mother  
354 and Child Health*. 2017;14(4).
- 355 27. Kiyani AN, Khushdil A, Ehsan A. Perinatal Factors Leading to Birth Asphyxia among Term Newborns  
356 in a Tertiary Care Hospital. *Iranian Journal of Pediatrics* 2014;24(5):637-42.
- 357 28. Prior T, Kumar S. Mode of delivery has an independent impact on neonatal condition at birth.  
358 *European Journal of Obstetrics and Gynecology and Reproductive Biology*. 2014;181:135-9.
- 359 29. Ilah BG, Aminu MS, Musa A, Adalakun MB, Adeniji AO, KolawolenT. Prevalence and Risk Factors for  
360 Perinatal Asphyxia as Seen at a Specialist Hospital in Gusau, Nigeria. *Sub-Saharan African Journal of  
361 Medicine*. 2015;2(2).
- 362 30. Gary L. Darmstadt, Luke C. Mullany, Joanne Katz, James M. Tielsch. Risk Factors for Neonatal  
363 Mortality due to Birth Asphyxia in Southern Nepal: A Prospective, Community-based Cohort Study.  
364 NIH Public Access. 2008;121(5).
- 365 31. STANFORD CHILDREN'S HEALTH. Low Birthweight 2018 [cited 2018 May 22]. Available from:  
366 <http://www.stanfordchildrens.org/en/topic/default?id=low-birthweight-90-P02382>.
- 367 32. Kibai E, Victor D, J A. PERINATAL RISK FACTORS ASSOCIATED WITH BIRTH ASPHYXIA AMONG TERM  
368 NEONATES AT COUNTY REFFERAL HOSPITAL, KENYA. *International Journal of Advanced research*.  
369 2017;5(7).

370
